# Supplementary material for: Effects of School-Based Health-Promoting Activities on Children’s Health: A Pragmatic Real-World Study
Source: MDPI journal article supplement (doi:10.3390/nu15153349), 2023-07-27
Supplement: s1 [file s1]

**Supplementary Figure S1. Flowchart Study Participation.**

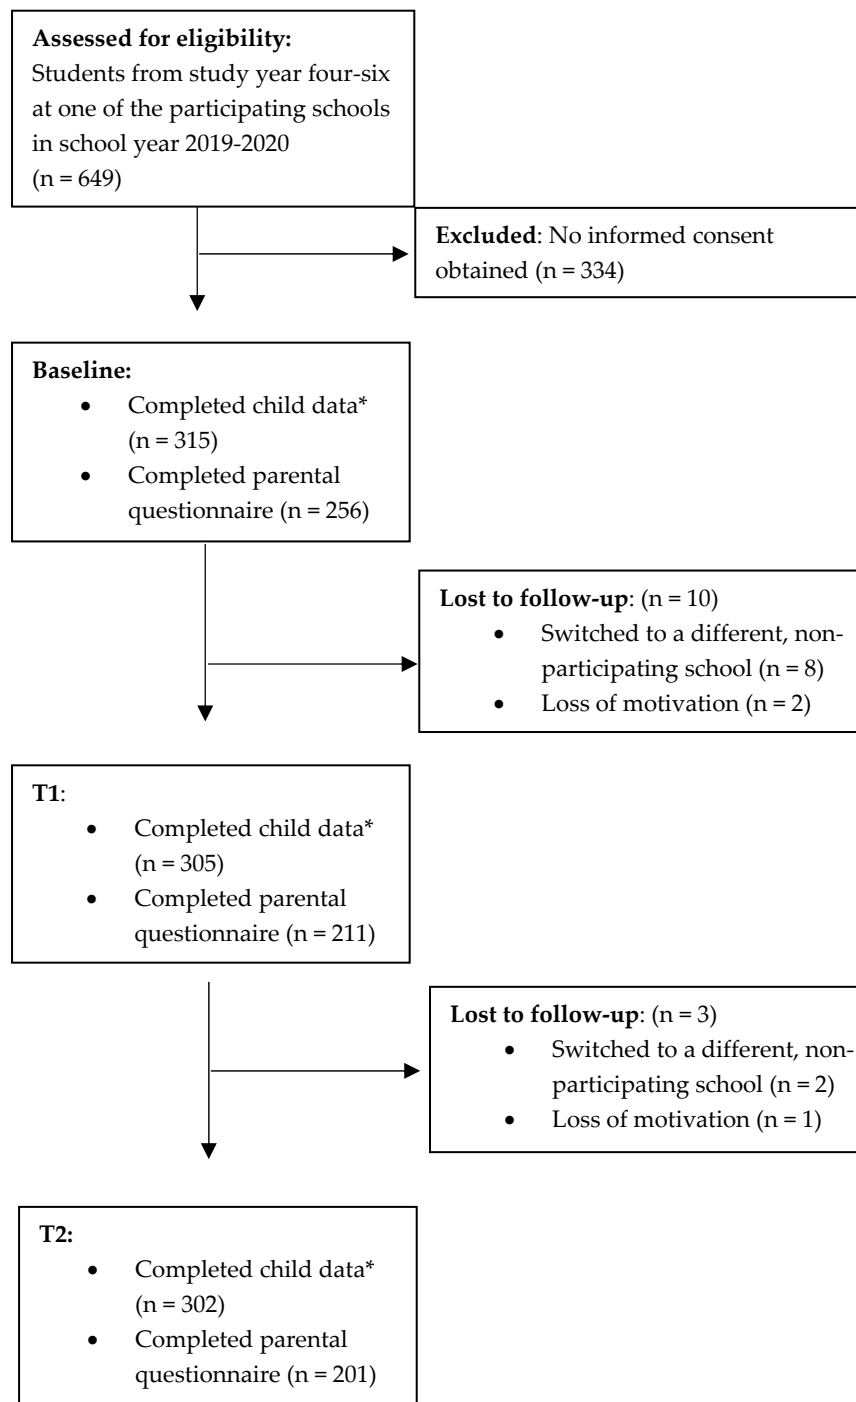

**Figure S1.** Flowchart Study Participation.

\*Child data concerns anthropometric measurements and child-reported questionnaires.
