# Supplementary material for: Effects of School-Based Health-Promoting Activities on Children’s Health: A Pragmatic Real-World Study
Source: MDPI journal article supplement (doi:10.3390/nu15153349), 2023-07-27
Supplement: s1 [file s1]

# Supplementary Table S1. Observed outcomes at the various time points (T0-T2).

**Table S1.** Observed outcomes at the various time points (T0-T2).

|                                                                    | <b>T0</b>                  |              |           |                         |              |           |
|--------------------------------------------------------------------|----------------------------|--------------|-----------|-------------------------|--------------|-----------|
|                                                                    | <b>Medium Implementers</b> |              |           | <b>Low Implementers</b> |              |           |
|                                                                    | <b>n</b>                   | <b>% / M</b> | <b>SD</b> | <b>n</b>                | <b>% / M</b> | <b>SD</b> |
| BMI z-score                                                        | 143                        | -0.15        | 0.82      | 172                     | -0.10        | 0.94      |
| Waist circumference (cm)                                           | 143                        | 56.84        | 4.66      | 172                     | 58.62        | 6.77      |
| PA summary score (1-5)                                             | 143                        | 3.04         | 0.64      | 172                     | 2.94         | 0.67      |
| Healthy dietary behaviours (days/week) <sup>1</sup>                | 114                        | 5.57         | 0.96      | 142                     | 5.56         | 0.95      |
| Soft drink consumption (days/week)                                 | 114                        | 4.31         | 2.74      | 142                     | 4.06         | 2.78      |
| Water consumption at school (0-3) <sup>2</sup>                     | 143                        | 1.43         | 1.22      | 172                     | 1.25         | 1.13      |
| Fruit (% yes)                                                      | 143                        | 34.3         |           | 172                     | 34.3         |           |
| Vegetables (% yes)                                                 | 143                        | 24.5         |           | 172                     | 25.6         |           |
| Grains (% yes) <sup>3</sup>                                        | 143                        | 92.3         |           | 172                     | 93.6         |           |
| Dairy (% yes) <sup>4</sup>                                         | 143                        | 37.1         |           | 172                     | 33.7         |           |
| Water (% yes)                                                      | 143                        | 32.9         |           | 172                     | 26.7         |           |
| Butter (% yes)                                                     | 143                        | 59.4         |           | 172                     | 62.2         |           |
| At least two healthy food groups during lunch (% yes) <sup>5</sup> | 143                        | 87.4         |           | 172                     | 88.4         |           |

  

|                                                     | <b>T1</b>                  |              |           |                         |              |           |
|-----------------------------------------------------|----------------------------|--------------|-----------|-------------------------|--------------|-----------|
|                                                     | <b>Medium Implementers</b> |              |           | <b>Low Implementers</b> |              |           |
|                                                     | <b>n</b>                   | <b>% / M</b> | <b>SD</b> | <b>n</b>                | <b>% / M</b> | <b>SD</b> |
| BMI z-score                                         | 137                        | -0.14        | 0.83      | 168                     | -0.03        | 0.97      |
| Waist circumference (cm)                            | 137                        | 58.49        | 5.64      | 168                     | 59.40        | 6.68      |
| PA summary score (1-5)                              | 137                        | 3.19         | 0.58      | 168                     | 3.25         | 0.59      |
| Healthy dietary behaviours (days/week) <sup>1</sup> | 90                         | 5.38         | 0.94      | 121                     | 5.56         | 0.90      |
| Soft drink consumption (days/week)                  | 90                         | 4.07         | 2.67      | 121                     | 3.63         | 2.88      |
| Water consumption at school (0-3) <sup>2</sup>      | 137                        | 1.47         | 1.13      | 168                     | 1.40         | 1.16      |
| Fruit (% yes)                                       | 137                        | 31.4         |           | 168                     | 26.8         |           |
| Vegetables (% yes)                                  | 137                        | 31.4         |           | 168                     | 23.8         |           |
| Grains (% yes) <sup>3</sup>                         | 137                        | 94.2         |           | 168                     | 93.5         |           |

**Table S1. Cont.**

|                                                                    | Medium Implementers |       |      | Low Implementers |       |      |
|--------------------------------------------------------------------|---------------------|-------|------|------------------|-------|------|
|                                                                    | n                   | % / M | SD   | n                | % / M | SD   |
| Dairy (% yes) <sup>4</sup>                                         | 137                 | 39.4  |      | 168              | 39.3  |      |
| Water (% yes)                                                      | 137                 | 38.0  |      | 168              | 31.0  |      |
| Butter (% yes)                                                     | 137                 | 59.1  |      | 168              | 60.7  |      |
| At least two healthy food groups during lunch (% yes) <sup>5</sup> | 137                 | 86.1  |      | 168              | 88.7  |      |
| <b>T2</b>                                                          |                     |       |      |                  |       |      |
|                                                                    | Medium Implementers |       |      | Low Implementers |       |      |
|                                                                    | n                   | % / M | SD   | n                | % / M | SD   |
| BMI z-score                                                        | 136                 | -0.10 | 0.88 | 166              | -0.05 | 0.98 |
| Waist circumference (cm)                                           | 136                 | 61.12 | 5.94 | 166              | 61.57 | 7.11 |
| PA summary score (1-5)                                             | 136                 | 3.12  | 0.62 | 166              | 3.17  | 0.65 |
| Healthy dietary behaviours (days/week) <sup>1</sup>                | 82                  | 5.45  | 0.90 | 119              | 5.52  | 0.84 |
| Soft drink consumption (days/week)                                 | 82                  | 3.35  | 2.61 | 119              | 3.43  | 2.70 |
| Water consumption at school (0-3) <sup>2</sup>                     | 136                 | 1.63  | 1.20 | 166              | 1.73  | 1.17 |
| Fruit (% yes)                                                      | 136                 | 22.8  |      | 166              | 23.5  |      |
| Vegetables (% yes)                                                 | 136                 | 19.9  |      | 166              | 19.9  |      |
| Grains (% yes) <sup>3</sup>                                        | 136                 | 94.9  |      | 166              | 92.8  |      |
| Dairy (% yes) <sup>4</sup>                                         | 136                 | 48.5  |      | 166              | 38.0  |      |
| Water (% yes)                                                      | 136                 | 44.9  |      | 166              | 38.6  |      |
| Butter (% yes)                                                     | 136                 | 55.1  |      | 166              | 56.6  |      |
| At least two healthy food groups during lunch (% yes) <sup>5</sup> | 136                 | 89.7  |      | 166              | 86.7  |      |

<sup>1</sup> Healthy dietary behaviours is a composite score for frequency of consumption of breakfast, fruit, vegetables, and water.

<sup>2</sup> School water consumption ranges from never (0) to daily (3).

<sup>3</sup> Grains consists of the items: bread and cereals.

<sup>4</sup> Dairy consists of the items: milk/yoghurt and cheese.

<sup>5</sup> Items in the healthy food groups include: fruit, vegetables, grains, dairy, water, and butter.

Abbreviations: M, mean; SD, standard deviation; SES, socioeconomic status; PA, physical activity.
